# Supplementary material for: p16INK4a-siRNA nanoparticles attenuate cartilage degeneration in osteoarthritis by inhibiting inflammation in fibroblast-like synoviocytes
Source: Royal Society of Chemistry journal article supplement (doi:10.1039/d1bm01941d), 2022-01-01
Supplement: d1bm01941d1.pdf [file d1bm01941d1.pdf]

**Supplementary information for**

**p16INK4a-siRNA nanoparticles attenuate cartilage degeneration in osteoarthritis by inhibiting inflammation in fibroblast-like synoviocytes**

Hyewon Park<sup>a,b</sup>, Ha-Reum Lee<sup>c</sup>, Hyo Jung Shin<sup>b</sup>, Ji Ah Park<sup>d</sup>, Yongbum Joo<sup>e</sup>, Sun Moon Kim<sup>f</sup>, Jaewon Beom<sup>g</sup>, Seong Wook Kang<sup>h</sup>, Dong Woon Kim<sup>a,b,\*</sup>, Jinhyun Kim<sup>h,\*</sup>

<sup>a</sup>Department of Medical Science, Chungnam National University College of Medicine, Daejeon, Republic of Korea.

<sup>b</sup>Department of Anatomy & Cell Biology, Brain Research Institute, Chungnam National University College of Medicine, Daejeon, Republic of Korea.

<sup>c</sup>Research Institute for Medical Sciences, Chungnam National University College of Medicine, Daejeon, Republic of Korea.

<sup>d</sup>Brain Research Institute, Chungnam National University College of Medicine, Daejeon, Republic of Korea.

<sup>e</sup>Department of Orthopedics, Chungnam National University College of Medicine, Daejeon, Republic of Korea.

<sup>f</sup>Department of Internal Medicine, Chungbuk National University Hospital, Cheong-ju, Chungcheongbuk-do, Republic of Korea

<sup>g</sup>Department of Rehabilitation Medicine, Seoul National University College of Medicine, Seoul National University Bundang Hospital, Seongnam, Gyeonggi-do, Republic of Korea.

<sup>h</sup>Department of Internal Medicine, Chungnam National University College of Medicine, Daejeon, Republic of Korea.

\*Corresponding authors: Dong Woon Kim, Department of Anatomy, Brain Research Institute, Chungnam National University College of Medicine, Daejeon, 35015, Republic of Korea, or Jinhyun Kim, Department of Internal Medicine, Chungnam National University College of Medicine, Daejeon, 35015, Republic of Korea. E-mail addresses: visnu528@cnu.ac.kr (DW Kim), jkim@cnuh.co.kr (J Kim)

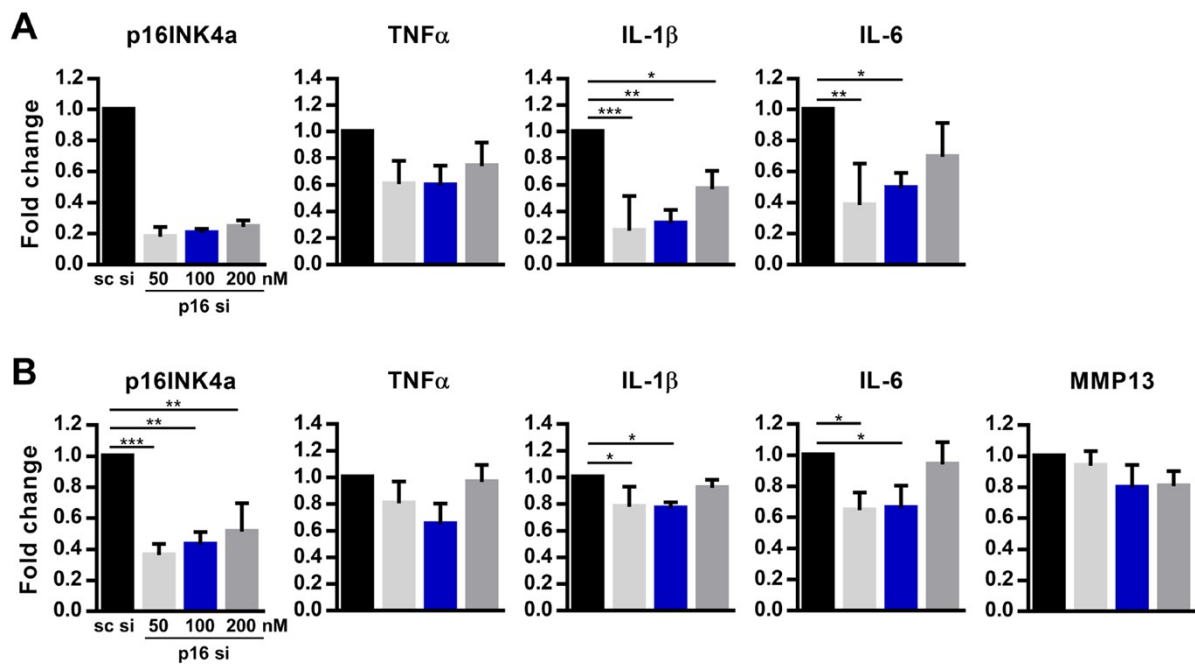

**Supplement Fig. Dose-response effect on cytokine expression by increasing concentration p16INK4a transfection.**

(A) p16INK4a siRNA (50-200 nM) or scrambled siRNA as the negative control (NC, 200 nM) were transfected into human FLS with Lipofectamine 2000. After 2 d, the mRNA expression of p16INK4a, TNF- $\alpha$ , IL-1 $\beta$ , IL-6, and MMP13 was quantified by qPCR. (B) p16INK4a siRNA (50-200 nM) or scrambled siRNA (NC, 100 nM) were transfected into human FLS with RNAiMAX reagents. After 2 d, the mRNA expression of p16INK4a, TNF- $\alpha$ , IL-1 $\beta$ , IL-6, and MMP13 was quantified by qPCR. The data are expressed as the mean  $\pm$  SEM (one-way ANOVA with Tukey's post-hoc test; \*P < 0.05 vs. NC).
